# Supplementary material for: Genomic organization of the crested ibis MHC provides new insight into ancestral avian MHC structure
Source: PubMed Central journal article supplement — Sci Rep. 2015 Jan 22;5:7963. doi: 10.1038/srep07963 (PMC4302302; doi:10.1038/srep07963), 2015-01-22
Supplement: srep07963-s1.pdf [file srep07963-s1.pdf]

**Genomic organization of the crested ibis MHC provides new insight  
into ancestral avian MHC structure**

Li-Cheng Chen<sup>†</sup>, Hong Lan<sup>†</sup>, Li Sun<sup>†</sup>, Yan-Li Deng, Ke-Yi Tang, and Qiu-Hong

Wan\*

**Table S1.** Primers used for screening BACs

| Region | Primer name   | Location        | Primer sequence (5' → 3')   | Product length (bp) | Positive BAC clones <sup>a</sup>                                                                                                                |
|--------|---------------|-----------------|-----------------------------|---------------------|-------------------------------------------------------------------------------------------------------------------------------------------------|
|        | N-BG          | <i>BG</i>       | F: AGCGTCTTGCACAGTGCAGACGT  | 223                 | <b>110G1</b> , <b>744D1</b> , <b>285F5</b> , <b>515F3</b> ,<br><b>1007B2</b> , <b>1228H11</b> , H1-8B2F1, etc.                                  |
|        |               |                 | R: CGTGGACGCTCGGAGCTTCGAGA  |                     |                                                                                                                                                 |
| BG     | 110G1-F       | end-primer      | F: CTGGGCAGGAGGTGGTGA       | 404                 | <b>110G1</b> , <b>1279H12</b> , <b>302C12</b> , <b>844G6</b> ,<br><b>980G4</b> , <b>1314A1</b> , <b>922G5</b> ,<br>M64-6D1G2, M109-4G12A7, etc. |
|        |               |                 | R: TTCTCGGAGGGCGTGTAG       |                     |                                                                                                                                                 |
| Core   | N-II $\alpha$ | MHC-II $\alpha$ | F: TCCCAGAGCCCTTTCGGTAACAAC | 442                 | M23-1B5D8, H28-4B11E7, etc.                                                                                                                     |
|        |               |                 | R: GCGCCGTCCGTCACCTCCTG     |                     |                                                                                                                                                 |
|        | N-II $\beta$  | MHC-II $\beta$  | F: GCATCCACAACCGGGAGCAG     | 161                 | M23-1B5D8, H28-4B11E7,<br><b>542D2</b> , etc.                                                                                                   |
|        | N-DMA         | <i>DMA</i>      | F: CGACCGGTGACGTTGGGTGAAC   | 144                 | M23-1B5D8, H28-4B11E7,<br><b>514C2</b> , <b>542D2</b> , etc.                                                                                    |
|        |               |                 | R: CGTGGACGCTCGGAGCTTCGAGA  |                     |                                                                                                                                                 |

|         |             |                             |     |                                                                |
|---------|-------------|-----------------------------|-----|----------------------------------------------------------------|
| N-I-1   | MHC-I       | F: CCCGCCTCGCCCTCACCTT      | 235 | <b>514C2</b> , <b>542D2</b> , <b>122F9</b> <sup>b</sup> , etc. |
|         |             | R: GGGGGATTTATCAGAACGCCTACG |     |                                                                |
| N-Tap2  | <i>Tap2</i> | F: AGTCGTGCTGCCCATCTGCT     | 142 | <b>514C2</b> , <b>1018A2</b> , H28-4B11E7                      |
|         |             | R: GCGGGGTTGTTGGAGCGATTCTAC |     |                                                                |
| Class I | MHC I       | F: GGAGGCCCAGGTGTAGTAGGTGC  | 288 | <b>122F9</b> , <b>1189C6</b> , H24-3G7B3,                      |
|         |             | R: GCGGGCCGTGCTGGAGAG       |     | H56-2A11C2, etc.                                               |
| 122F9-F | end-primer  | F: TGGGGTGGTGGCTCCTCCTCTT   | 436 | <b>122F9</b> , <b>988E8</b> , H24-3G7B3,                       |
|         |             | R: AGGGCCTGGTGGGTGGATGAAG   |     | H56-2A11C2                                                     |

<sup>a</sup> Shaded BACs were used in the tiling path (Figure 1). Bold BACs are from the routine genomic library, and other BACs are from the reverse-4D library. The “etc” represents that there are more possible positive BACs in the reverse-4D library; however, we stopped screening owing to inconvenient non-gridded properties of the reverse-4D library for obtaining lots of positive BACs <sup>[S1]</sup>.

<sup>b</sup> This BAC is a real positive clone due to universal class I primers but it does not overlap with the BACs in the Core Region.

**Table S2.** Comparison of the crested ibis MHC genes with those in other species

| Locus <sup>a</sup> | No. of exons | Species <sup>b</sup> | Prominent features of the highest amino acid similarity | Amino acid seq. ass. no. | Positive (%) | E-value <sup>c</sup> | Conserved domain   |
|--------------------|--------------|----------------------|---------------------------------------------------------|--------------------------|--------------|----------------------|--------------------|
| <i>Blec1</i>       | 5            | Rock pigeon          | C-type lectin domain family 2 member B                  | EMC86793                 | 87           | 1e-26                | CLECT              |
| <i>Blec2</i>       | 5            | Rock pigeon          | C-type lectin domain family 2 member B                  | EMC86793                 | 87           | 3e-26                | CLECT              |
| <i>zfp7</i>        | 14           | Chicken              | Zinc finger protein 692                                 | NP_0010928<br>26         | 72           | 0.0                  | COG5948 SFP1       |
| <i>TRIM7.2</i>     | 7            | Turkey               | TRIM protein 7                                          | ADU03778                 | 97           | 0.0                  | RING BBOX PRY SPRY |
| <i>zfp6</i>        | 3            | Turkey               | B-locus zinc finger protein 2                           | ACA64750                 | 66           | 0.0                  | KRAB COG5048       |
| <i>ckr1</i>        | 2            | Green<br>seaturtle   | Zinc finger protein CKR1                                | EMP25061                 | 75           | 0.0                  | KRAB COG5048       |
| <i>zfp5</i>        | 3            | Green<br>seaturtle   | Zinc finger protein                                     | EMP25063                 | 75           | 0.0                  | KRAB COG5048 SFP1  |
| <i>LAO</i>         | 7            | Chicken              | L-amino-acid oxidase                                    | BAJ53002                 | 89           | 0.0                  | Amino_oxidase      |

|                  |    |         |                                                 |           |     |        |                               |
|------------------|----|---------|-------------------------------------------------|-----------|-----|--------|-------------------------------|
| <i>TRIM7.1</i>   | 7  | Turkey  | TRIM protein 7                                  | ACA64755  | 94  | 0.0    | RING BBOX BBC PRY<br>SPRY     |
| <i>Hep21</i>     | 3  | Chicken | Hep21 protein precursor                         | NP_989852 | 85  | 9e-64  | none found                    |
| <i>TRIM39.2</i>  | 6  | Chicken | TRIM protein 39                                 | BAJ53005  | 87  | 0.0    | RING BBOX PRY SPRY            |
| <i>TRIM27.2</i>  | 7  | Turkey  | TRIM 27                                         | ACA64758  | 79  | 0.0    | RING BBOX COG4467<br>PRY SPRY |
| <i>TRIM39.1</i>  | 6  | Chicken | TRIM protein 39                                 | BAJ53007  | 77  | 1e-141 | PRY SPRY                      |
| <i>TRIM27.1</i>  | 6  | Chicken | TRIM 27                                         | AAW82327  | 83  | 0.0    | RING BBOX PRY SPRY            |
| <i>TRIM-like</i> | 8  | Mallard | Zinc finger protein RFP                         | EOB02164  | 71  | 0.0    | RING BBOX PRY SPRY            |
| <i>TRIM41</i>    | 6  | Turkey  | TRIM protein 41                                 | ACA64761  | 94  | 0.0    | RING BBOX BBC PRY<br>SPRY     |
| <i>GNB2L1</i>    | 8  | Human   | Guanine nucleotide binding protein<br>β-2-like1 | EAW53696  | 100 | 0.0    | WD40                          |
| <i>BTN1</i>      | 44 | Turkey  | B-butyrophilin 1                                | ACA64763  | 73  | 0.0    | PRY SPRY                      |
| <i>BTN2</i>      | 9  | Turkey  | B-butyrophilin 2                                | ACA64764  | 70  | 2e-115 | BBC SPR SPRY KRAB             |

|                  |                      |                    |                                                  |                  |    |        |                              |
|------------------|----------------------|--------------------|--------------------------------------------------|------------------|----|--------|------------------------------|
| <i>zfp4</i>      | 2                    | Mallard            | Zinc finger protein 271                          | EOA93444         | 92 | 0.0    | COG5048                      |
| <i>zfp3</i>      | 3                    | Mallard            | Zinc finger protein 208                          | EOA93445         | 88 | 0.0    | COG5048                      |
| <i>BG2</i>       | 43                   |                    | No significant homology                          |                  |    |        | IG_MOG_like V-set<br>COG5048 |
| <i>zfp2</i>      | 4                    | Mallard            | Zinc finger and SCAN domain-containing protein 2 | EOA94931         | 89 | 0.0    | COG5048                      |
| <i>BG1</i>       | 2                    | Green<br>seaturtle | Butyrophilin subfamily 2 member A1               | EMP39643         | 73 | 3e-78  | IG_MOG_like V-set            |
| <i>BTN1-like</i> | 7                    | Chicken            | Butyrophilin subfamily 1 member A1               | NP_0010299<br>89 | 62 | 4e-53  | PRY SPRY                     |
| <i>zfp1</i>      | 2                    | Mallard            | Zinc finger and SCAN domain-containing protein 2 | EOA94844         | 59 | 2e-111 | COG5048                      |
| <i>COL11A2</i>   | Partial <sup>d</sup> | Mouse              | Collagen alpha-2(XI) chain precursor             | Q64739           | 85 | 0.0    | Collagen COLFI               |
| <i>DAA</i>       | 4                    | Mallard            | MHC class II alpha chain                         | AEH96282         | 87 | 5e-143 | MHC_II_alpha IgC             |

|             |                      |                      |                             |          |    |        |                  |
|-------------|----------------------|----------------------|-----------------------------|----------|----|--------|------------------|
| <i>DAB</i>  | 6                    | Swan goose           | MHC class II beta chain     | ACH81993 | 85 | 2e-147 | MHC_II_beta IgC  |
| <i>DBA1</i> | 4                    | Mallard              | MHC class II alpha chain    | ADM53418 | 81 | 5e-131 | MHC_II_alpha IgC |
| <i>DBB1</i> | 6                    | Swan goose           | MHC class II beta chain     | ACH81993 | 83 | 7e-142 | MHC_II_beta IgC  |
| <i>DBA2</i> | 4                    | Mallard              | MHC class II alpha chain    | ADM53418 | 81 | 5e-131 | MHC_II_alpha IgC |
| <i>DBB2</i> | 6                    | Thin-billed<br>prion | MHC class II beta chain     | ACO36253 | 86 | 8e-138 | MHC_II_beta IgC  |
| <i>DBA3</i> | 4                    | Mallard              | MHC class II alpha chain    | ADM53418 | 81 | 5e-131 | MHC_II_alpha IgC |
| <i>DBB3</i> | 6                    | Thin-billed<br>prion | MHC class II beta chain     | ACO36253 | 86 | 1e-137 | MHC_II_beta IgC  |
| <i>BRD2</i> | Partial <sup>d</sup> | Japanese<br>quail    | Serine threonine Kinase     | BAC82511 | 89 | 0.0    | Bromo            |
| <i>DMA</i>  | Partial <sup>d</sup> | Mallard              | MHC class II M alpha chain  | EOA93964 | 80 | 2e-99  | MHC_II_alpha IgC |
| <i>DMB1</i> | 5                    | Turkey               | MHC class II M beta chain 1 | ACA64776 | 70 | 5e-109 | IgC              |

|               |                      |                         |                                                  |          |    |        |                            |
|---------------|----------------------|-------------------------|--------------------------------------------------|----------|----|--------|----------------------------|
| <i>DMB2</i>   | Partial <sup>d</sup> | Greater prairie chicken | MHC class II M beta chain 2                      | AGC96181 | 79 | 1e-118 | IgC                        |
| <i>UAA</i>    | 7                    | Red-billed gull         | MHC class I antigen                              | ADW65600 | 87 | 1e-179 | MHC_I IgC                  |
| <i>TAP1</i>   | 12                   | Golden pheasant         | Transporter associated with antigen processing 1 | AFN53621 | 79 | 0.0    | ABC_membrane<br>ABC_ATPase |
| <i>TAP2</i>   | 9                    | Turkey                  | Transporter associated with antigen processing 2 | ACA64780 | 75 | 0.0    | ABC_membrane<br>ABC_ATPase |
| <i>LTB4R1</i> | Partial <sup>d</sup> | Chicken                 | Leukotriene B4 receptor 1                        | BAF63011 | 81 | 2e-125 | 7tm_1                      |
| <i>TNXB</i>   | Partial <sup>d</sup> | Mallard                 | Tenascin-X                                       | EOA94117 | 76 | 0.0    | FN3                        |
| <i>UBA</i>    | Partial <sup>d</sup> | Red-billed gull         | MHC class I antigen                              | ADW65600 | 84 | 2e-171 | MHC_I IgC                  |



|                             |    |                    |                                        |           |    |        |                |
|-----------------------------|----|--------------------|----------------------------------------|-----------|----|--------|----------------|
| <i>UCA1</i>                 | 7  | Red-billed<br>gull | MHC class I antigen                    | ADW65600  | 84 | 2e-166 | MHC_I IgC      |
| <i>ADPRH 1</i>              | 6  | Rock pigeon        | [Prtein ADP-ribosylarginine] hydrolase | EMC80157  | 80 | 3e-171 | ADP_ribosyl_GH |
| <i>ADPRH 2</i>              | 8  | Rock pigeon        | [Prtein ADP-ribosylarginine] hydrolase | EMC80157  | 83 | 0.0    | ADP_ribosyl_GH |
| <i>UCA2</i>                 | 7  | Red-billed<br>gull | MHC class I antigen                    | ADW65600  | 84 | 9e-168 | MHC_I IgC      |
| <i>ADPRH 3</i>              | 4  | Rock pigeon        | [Prtein ADP-ribosylarginine] hydrolase | EMC80157  | 84 | 4e-99  | ADP_ribosyl_GH |
| <i>UDA</i>                  | 7  | Red-billed<br>gull | MHC class I antigen                    | ADW65600  | 82 | 9e-166 | MHC_I IgC      |
| <i>OR</i>                   | 1  | Green<br>seaturtle | Olfactory receptor 11A1                | EMP42676  | 76 | 1e-135 | 7tm_4 7tm_1    |
| PHD finger<br>protein7-like | 11 | Chicken            | PHD finger protein 7-like              | XP_425998 | 67 | 3e-114 | zf-HC5HC2H     |

*USP42*-like<sup>e</sup> 1

No significant homology

---

<sup>a</sup>Excludes two *TAPI* pseudogenes.

<sup>b</sup>Species in which the highest scoring matches were found.

<sup>c</sup>Expect value.

<sup>d</sup>Partial CDSs (coding sequences) were obtained due to gaps.

<sup>e</sup>Predicted CDS was similar to the mRNA sequence of ubiquitin specific peptidase 42 (*USP42*) by BLASTN; however, no significant homology was determined by BLASTP.

**Table S3.** Long and accurate PCR primers used to verify assembly of the complex MHC region showing tandem repeated “αβ” units

| Fragment               | Primer name       | Primer location                 | Primer sequence (5' → 3')      | Size (bp) | Extension time | Excluded segment   |
|------------------------|-------------------|---------------------------------|--------------------------------|-----------|----------------|--------------------|
| <i>COL11A2-DAA</i>     | P1-F              | <i>COL11A2</i>                  | CCTGCTTCCCAGTATCACGTTCCCTGC    | 4071      | 5 min          | <i>COL11A2</i> –   |
|                        | P1-R <sup>1</sup> | <i>DAA, DBA1/2/3</i> (exon 4)   | ATCATCGTGGGCACCATCCTCATCATCA   |           |                | <i>DBA1/2/3</i>    |
| <i>DAA-DAB</i>         | P2-F              | <i>DAA</i> (3'UTR)              | TGTGGGCTGGGTACTGGGACCAGTGCAG   | 3979      | 5 min          | <i>DAA</i> –       |
|                        | P2-R <sup>1</sup> | <i>DAB, DBB1/2/3</i> (intron 2) | TGCAAGGAGGTCAGGGAAGGGCGCAGGGGC |           |                | <i>DBB1/2/3</i>    |
| <i>DAB-DBA1-DBB1</i>   | P3-F              | <i>DAB</i> (exon 2)             | AACAGCGGTTTTCCAGGAGCTGGCTGT    | 5437      | 7 min          | <i>DAB</i> –...    |
|                        | P3-R <sup>1</sup> | <i>DAB, DBB1/2/3</i> (exon 2)   | GCCCCACATCGCTGTCGAAGTGC        |           |                | – <i>DAB</i>       |
| <i>DBA1-DBB1-DBA2/</i> | P4-F              | <i>DBA1/2/3</i> (intron 2)      | CCTGTTGTGCCTCACTGCCACCCGGG     | 4963      | 6.5 min        | <i>DBA1/2</i> –... |
| <i>DBA2-DBB2-DBA3</i>  | P4-R <sup>1</sup> | <i>DAA, DBA1/2/3</i> (exon 3)   | CTGCCACCGCCCTCCTGAAGCACT       |           |                | – <i>DAA</i>       |
| <i>DBB1-DBA2-DBB2</i>  | P5-F              | <i>DBB1</i> (exon 2)            | GAGCGGGTGAGGTATGTGAAGAGGTA     | 5473      | 7 min          |                    |
|                        | P5-R              | <i>DBB2/3</i> (exon 2)          | CCACCGCAGCCCGTTTCTGCTCCAGTAT   |           |                |                    |

|                       |      |                               |                                |      |         |
|-----------------------|------|-------------------------------|--------------------------------|------|---------|
| <i>DBB2-DBA3-DBB3</i> | P6-F | <i>DAB, DBB1/2</i> (3'UTR)    | AGCTCAGCTTTGTTGTCACTGCTCTGCA   | 5224 | 7 min   |
|                       | P6-R | <i>DBB3</i> (3'UTR)           | GCAGGGTTGGCAGCAGCGGGTAGGAC     |      |         |
| <i>DBB3-BRD2</i>      | P7-F | <i>DAB, DBB1/2/3</i> (exon 2) | CCCCCCTGGGCGAGCCCCAAGCCAAGT    | 4800 | 6.5 min |
|                       | P7-R | <i>BRD2</i>                   | TCACCCGCGGCCTCCCGTGGCTGTCACCTA |      |         |

---

<sup>1</sup>The reverse primers P1–P4 were II $\alpha$ - or II $\beta$ -universal since we hoped to prove the absence of some segments simultaneously (no corresponding PCR product), and these putatively inexistent segment are listed in the column “Excluded segment.”

**Table S4.** Primers for quantitative real-time PCR (qRT-PCR) amplification and full-length cDNA sequence isolation

| Application | Locus           | Location | Primer name | Primer sequence (5'→3')     | Size (bp) | Ta ( °C) |
|-------------|-----------------|----------|-------------|-----------------------------|-----------|----------|
| qRT-PCR     | <i>UAA</i>      | Exon 1   | A-F         | GCCGTCGTCGGGGCGGCG          | 229       | 58       |
|             |                 | Exon 2   | A-R         | TGCTCTGTGCGATCTGGGTCTG      |           |          |
|             | <i>UBA</i>      | Exon 5   | B-F         | TTGCCGTCATTGCTGGATTCGCCT    | 153       | 58       |
|             |                 | 3'UTR    | B-R         | TTGCTTTGCACTAGCAGTTCTCTAC   |           |          |
|             | <i>UCA1/2</i>   | Exon 2   | C-F         | ACACCGAGACCCGGA ACTTTC      | 171       | 58       |
|             |                 | Exon 3   | C-R         | CGTCGTAGCCCATCTGCC          |           |          |
|             | <i>UDA</i>      | Exon 6   | D-F         | GTACGGCGTGGCGTCAGGGATC      | 118       | 58       |
|             |                 | 3'UTR    | D-R         | AGCCCCACCGTAGCTGGGACTG      |           |          |
| 5'RACE      | <i>DAB</i>      | Exon 3   | IIB1-5'R    | AAGGTCTCCCCCATGCAGTCGAGCTCC | 470       | 64       |
|             | <i>DBB1/2/3</i> | Exon 3   | IIB2-5'R    | CTCGACTGCACGGGGTAGATTTC     | 463       | 60       |
|             | <i>DAA</i>      | Exon 3   | IIA1-5'R    | CCCCCAGCTCCACAGGGTCCTCAGA   | 451       | 60       |
|             | <i>DBA1/2/3</i> | Exon 3   | IIA2-5'R    | CCCCCAGCTCCACTTGGCGTTTGGG   | 451       | 62       |
|             | <i>UAA/UBA</i>  | Exon 3   | UABA-5'R    | TGGTGCTACCGTCATAAAGTGTG     | 432, 438  | 58       |
|             | <i>UCA1/2</i>   | Exon 3   | UCA-5'R     | CATCTGCCAATATCCCGTGTGTGT    | 457       | 62       |

|        |                 |        |          |                                |          |    |
|--------|-----------------|--------|----------|--------------------------------|----------|----|
|        | <i>UDA</i>      | Exon 3 | UDA-5'R  | GCATCCTGCCGCCCTCCCGTGTGT       | 462      | 61 |
|        | <i>DAB</i>      | Exon 2 | IIB1-3'F | GTTTTCCAGGAGCTGGCTGTGT         | 889, 934 | 62 |
|        | <i>DBB1/2/3</i> | Exon 2 | IIB2-3'F | TACGTACAGTTCCAGTTTAAGTGC       | 889      | 61 |
|        | <i>DAA</i>      | Exon 2 | IIA1-3'F | CAACGCGATAATCCAGACTGACTTGT     | 1266     | 64 |
| 3'RACE | <i>DBA1/2/3</i> | Exon 2 | IIA2-3'F | GCACACGATCCACCAAGCTGAGTTCC     | 1008     | 63 |
|        | <i>UAA</i>      | Exon 2 | UAA-3'F  | GGGACACCCAGACCCAGATCG          | 1116     | 62 |
|        | <i>UBA</i>      | Exon 2 | UBA-3'F  | CAGGTTGCTCTTGCGGAAAGAGCCCACACA | 1379     | 59 |
|        | <i>UCA1/2</i>   | Exon 2 | UCA-3'F  | ACCCGGAACCTTTCTGGGACCACACA     | 1119     | 60 |
|        | <i>UDA</i>      | Exon 2 | UDA-3'F  | ACTGGGTGAGAGGGAGCCCTCACACA     | 1037     | 61 |

**Figure S1. Genomic location (a) and electrophoresis (b) of seven long and accurate PCR primers (P1–P7).** Only the shortest fragments were obtained for forward and/or reverse primers with non-specific binding. P4 amplified two different fragments with the same length due to the high sequence similarity among *DBAs 1–3*.

M: DL2504 DNA marker (NormalRun™ 250bp-IV DNA ladder, Generay

Biotechnology).

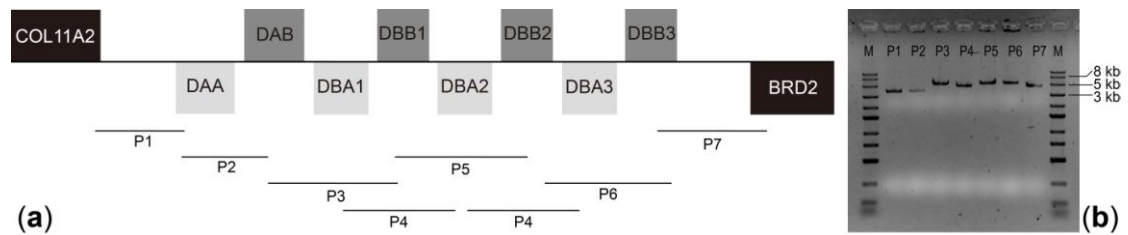

**Figure S2. Full-length amino acid alignments of II $\alpha$  (a) and II $\beta$  genes (b). Dots**

indicate identity to the first sequence. Crosses represent putative antigen-binding sites

inferred from Brown *et al.* [S2] and Stern *et al.* [S3].

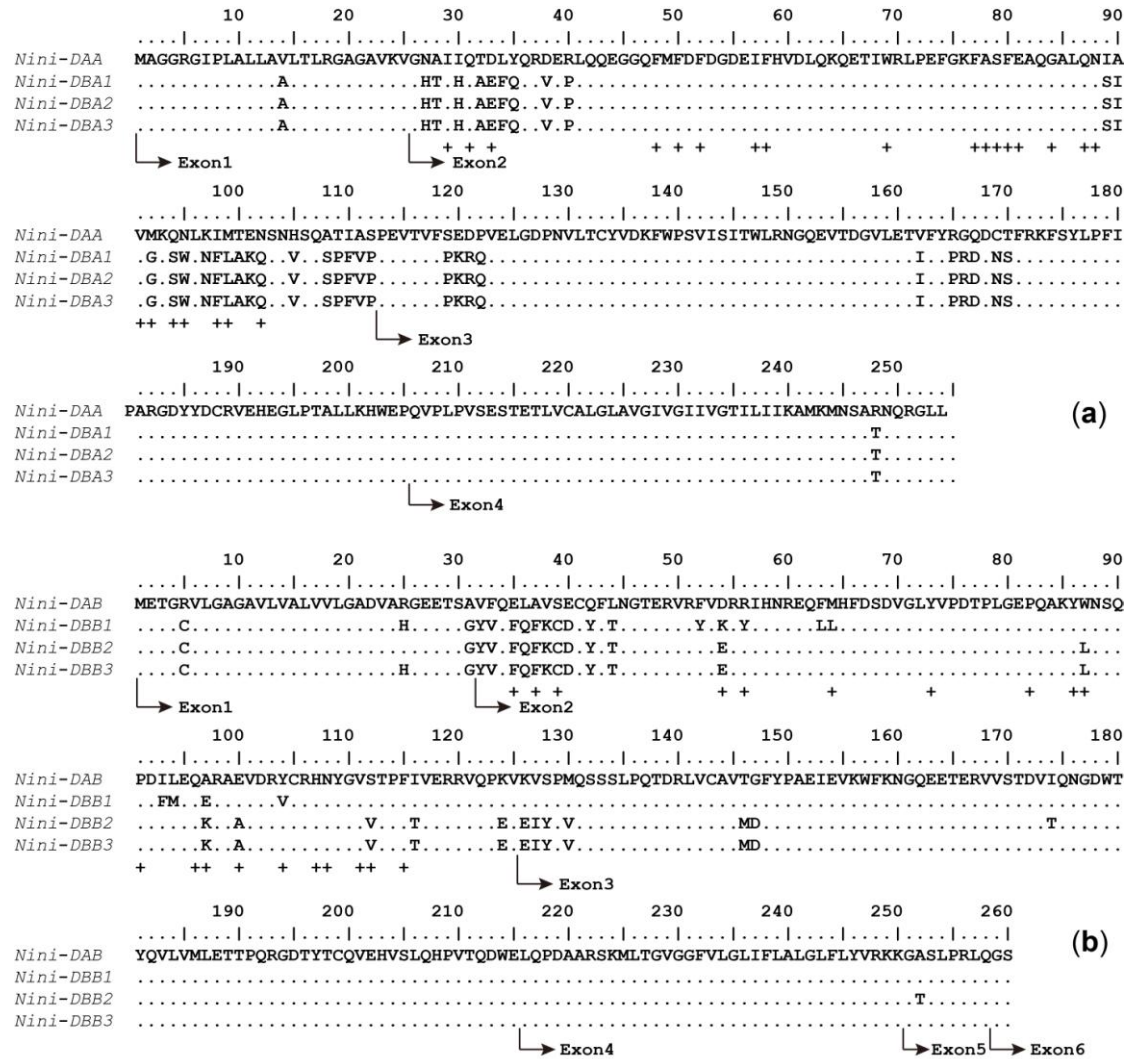



## Supplementary References

- [S1] Ye, Q., He, K., Wu, S.-Y. & Wan, Q.-H. Isolation of a 97-kb minimal essential MHC B locus from a new reverse-4D BAC library of the golden pheasant. *PLoS One* **7**, e32154, doi:10.1371/journal.pone.0032154 (2012).
- [S2] Brown, J. H. *et al.* Three-dimensional structure of the human class-II histocompatibility antigen HLA-DR1. *Nature* **364**, 33-39 (1993).
- [S3] Stern, L. J. *et al.* Crystal-structure of the human class-II MHC protein HLA-DR1 complexed with an influenza-virus peptide. *Nature* **368**, 215-221 (1994).
